# Supplementary material for: A Fundamental Study on the Extraction of Particulate Organic Carbon from Municipal Wastewater Treatment Plants
Source: MDPI journal article supplement (doi:10.3390/w15101861), 2023-05-14
Supplement: s1 [file s1]

Archive with 1 entries (1 files):
- water-2372596-supplementary.pdf
